# Supplementary material for: Identification of isolated or mixed strains from long reads: a challenge met on Streptococcus thermophilus using a MinION sequencer
Source: PubMed Central journal article supplement — Microb Genom. 2021 Nov 23;7(11):000654. doi: 10.1099/mgen.0.000654 (PMC8743539; doi:10.1099/mgen.0.000654), 2021-11-23
Supplement: mgen-7-0654-s001.pdf [file mgen-7-0654-s001.pdf]

# Supplementary material

Identification of Isolated or Mixed Strains from Long Reads:  
A Challenge met on *Streptococcus thermophilus* Using a MinION Sequencer

Grégoire Siekaniec <sup>1,2,†</sup>, Emeline Roux <sup>1,3</sup>, Téo Lemane <sup>1</sup>, Eric Guédon <sup>2</sup>, and Jacques Nicolas <sup>1,\*</sup>

<sup>1</sup> Univ Rennes, INRIA, Campus de Beaulieu 35042 Rennes cedex, France

<sup>2</sup> INRAE, Institut Agro, STLO, F-35000, Rennes, France

<sup>3</sup> CALBINOTOX (Composés ALimentaire BIo fonctionnalités et risques NeuTOXiques) EA7488 Université de Lorraine, France; emeline.roux@univ-lorraine.fr

\* Correspondence: jacques.nicolas@inria.fr

† mail address: gregoire.siekaniec@inria.fr

| Strain      | Size (Mb) | GC%  | Contig | Status          | Accession       | WGS    | Source                         | Year | Country        | Reference                          |
|-------------|-----------|------|--------|-----------------|-----------------|--------|--------------------------------|------|----------------|------------------------------------|
| 05-34       | 1.80032   | 38.9 | 43     | Scaffold        |                 | QFLC01 | kefir grains                   | 2010 | China          | Qin et al., 2011                   |
| 1F8CT       | 1.74694   | 39.1 | 60     | Chromosome      | NZ_CM0003138    | AZTK01 | curd from Grana Padano cheese  | 2012 | Italy          | Treu et al., 2014c                 |
| ACA-DC 2    | 1.73184   | 39.2 | 1      | Complete Genome | NZ_LIT604076    |        | Greek yogurt                   |      | Greece         | Alexandraki et al., 2017           |
| APC151      | 1.83913   | 39.1 | 1      | Complete Genome | NZ_CP019935     |        | digestive tract of marine fish | 2015 | Ireland        | Linares et al., 2016, 2017         |
| ATCC 1275   | 1.8455    | 39.1 | 1      | Complete Genome | NZ_CP006819     |        |                                |      | Australia      | Wu et al., 2014                    |
| ATCC 19258  | 2.0747    | 38.9 | 88     | Scaffold        |                 | PRKU01 | culture                        | 2017 | Denmark        |                                    |
| B59671      | 1.82117   | 39.1 | 1      | Complete Genome | NZ_CP022547     |        | raw milk                       |      | USA            | Renye et al., 2017                 |
| BIO1488     | 1.74857   | 39.0 | 52     | Contig          |                 | WMLD01 |                                |      |                |                                    |
| C106        | 1.76901   | 38.9 | 85     | Contig          |                 | LGRS01 | cheese                         | 2010 | Ireland        | Wels et al., 2015                  |
| CAG:236     | 1.63196   | 39.0 | 66     | Scaffold        | GCA_000434755.1 | CBBT01 | distal human gut microbiota    | 2013 |                |                                    |
| CNRZ1066    | 1.79623   | 39.1 | 1      | Complete Genome | NC_006449       |        | yogurt                         |      | France         | Bolotin et al., 2004               |
| CS8         | 1.79166   | 39.0 | 1      | Complete Genome | NZ_CP016439     |        | rubin                          | 2015 | China          |                                    |
| DGCC 7710   | 1.85121   | 39.0 | 1      | Complete Genome | CP025216        |        | dairy culture                  |      |                | Hatmaker et al., 2018              |
| EPS         | 1.81231   | 39.0 | 1      | Complete Genome | CP025400        |        | milk                           | 2016 | China          |                                    |
| FAM 13496   | 1.83635   | 38.9 | 62     | Contig          |                 | VBTK01 | cheese starter culture         | 1988 | Switzerland    |                                    |
| GABA        | 1.85747   | 39.1 | 1      | Complete Genome | CP025399        |        | milk                           | 2016 | China          |                                    |
| IDCC2201    | 1.79483   | 39.2 | 1      | Complete Genome | NZ_CP035306     |        | home-made cheese               | 2018 | South Korea    |                                    |
| JIM 8232    | 1.9299    | 38.9 | 1      | Complete Genome | NC_017581       |        | Milk                           | 2002 | France         | Delorme et al., 2010, 2011         |
| KLDS 3:1003 | 1.89996   | 38.9 | 1      | Complete Genome | NZ_CP016877     |        | traditional yogurt culture     |      | Inner Mongolia | Evivie et al., 2017                |
| KLDS8.1012  | 1.86802   | 39.2 | 10     | Scaffold        |                 | LHSK01 | traditional sour milk          | 2009 | Inner Mongolia | Tian et al., 2018                  |
| KLDS SM     | 1.85679   | 39.1 | 1      | Complete Genome | NZ_CP016026     |        | naturally fermented yogurt     |      | Inner Mongolia | Li et al., 2018; Tian et al., 2018 |
| KU30        | 1.79076   | 38.9 | 43     | Contig          |                 | QFFS01 | milk                           | 2009 | China          | Makarova et al., 2006              |
| LMD-9       | 1.85637   | 39.1 | 3      | Complete Genome | NC_008532       |        |                                |      |                |                                    |
| Plasmid 1   | 4449 bp   | 37.0 |        |                 |                 |        |                                |      |                |                                    |
| Plasmid 2   | 3351 bp   | 35.1 |        |                 |                 |        |                                |      |                |                                    |
| LMG 18311   | 1.79685   | 39.1 | 1      | Complete Genome | NC_006448       |        | commercial yogurt              | 1974 | UK             | Bolotin et al., 2004               |
| LMG S-29186 | 1.79829   | 38.9 | 42     | Contig          |                 | NIGT01 |                                | 2017 | Italy          |                                    |
| M17PTZA496  | 2.06546   | 38.8 | 70     | Chromosome      | NZ_CM002372     | AZJT01 | Fontina cheese                 | 1996 | Italy          | Treu et al., 2014a                 |
| MN-BM-A01   | 1.87652   | 39.1 | 1      | Complete Genome | NZ_CP012588     |        | traditional yogurt block       | 2012 | China          | Bai et al., 2016                   |
| MN-BM-A02   | 1.85043   | 39.0 | 1      | Complete Genome | NZ_CP010999     |        | dairy Fan                      | 2008 | China          | Shi et al., 2015                   |
| MN-ZLAW-002 | 1.84852   | 39.1 | 1      | Complete Genome | NC_017927       |        | traditional yogurt block       |      | China          | Kang et al., 2012                  |
| MTCC 5460   | 1.60936   | 39.3 | 143    | Contig          |                 | ALIK01 | fermented milk product (curd)  | 1984 | India          | Prajapati et al., 2013             |
| MTCC 5461   | 1.6199    | 39.3 | 144    | Contig          |                 | ALIL01 | fermented milk product (curd)  | 1984 | India          | Treu et al., 2014a                 |
| MTH17CL396  | 1.82822   | 38.9 | 49     | Chromosome      | NZ_CM002371     | AZJS01 | Fontina cheese                 | 1996 | Italy          | Proust et al., 2018                |
| N4L         | 1.83175   | 39.1 | 1      | Complete Genome | NZ_LS974444     |        | milk                           |      |                |                                    |
| NCTC12958   | 2.10227   | 39.0 | 1      | Complete Genome | NZ_LS483339     |        | traditional dairy product      | 2010 | China          | Sun et al., 2010,2011              |
| ND03        | 1.83195   | 39.0 | 1      | Complete Genome | NC_017563       |        | fermented Yak milk             | 2005 | China          |                                    |
| ND07        | 1.86951   | 39.0 | 1      | Complete Genome | NZ_CP016394     |        | traditional dairy product      | 2013 | China          |                                    |
| S9          | 1.78744   | 39.1 | 1      | Complete Genome | NZ_CP013939     |        | industrial cheese starter      | 1996 |                |                                    |
| SMQ-301     | 1.86179   | 39.1 | 1      | Complete Genome | NZ_CP011217     |        | raw milk                       |      | USA            | Labrie et al., 2015                |
| ST106       | 1.85608   | 39.3 | 1      | Complete Genome | NZ_CP031881     |        | raw milk                       |      | USA            | Renye et al., 2019                 |
| ST109       | 1.78886   | 39.2 | 1      | Complete Genome | NZ_CP031545     |        | raw milk                       |      | USA            | Renye et al., 2019                 |
| ST3         | 1.86506   | 39.0 | 1      | Complete Genome | NZ_CP017064     |        | commerc. Diet. Supplements     |      |                |                                    |
| TH1435      | 1.75346   | 38.8 | 36     | Chromosome      | NZ_CM002369     | AYSG01 | raw goat milk                  | 2011 | Italy          | Treu et al., 2014b                 |
| TH1436      | 1.78213   | 38.8 | 28     | Chromosome      | NZ_CM002370     | AYTT01 | raw goat milk                  | 2011 | Italy          | Treu et al., 2014b                 |
| TH1477      | 1.88956   | 38.9 | 56     | Chromosome      | NZ_CM003135     | AZTJ01 | cow milk                       | 2012 | Italy          | Treu et al., 2014c                 |
| TH982       | 1.78931   | 38.8 | 52     | Chromosome      | NZ_CM003136     | AZTL01 | buffalo mozzarella curd        | 2003 | Italy          | Treu et al., 2014c                 |
| TH985       | 1.84443   | 39.0 | 84     | Chromosome      | NZ_CM003139     | AZTM01 | buffalo mozzarella whey        | 2003 | Italy          | Treu et al., 2014c                 |

Table S1: *Streptococcus thermophilus* genomes extracted from public databases.

| Strain       | Short name | Size (Mb) | GC%  | Contig | Status          | Accession    | Source                                                         | Year | Country     |
|--------------|------------|-----------|------|--------|-----------------|--------------|----------------------------------------------------------------|------|-------------|
| CIRM-BIA1035 | CIRM1035   | 1.81944   | 39.1 | 1      | Complete Genome | NZ_LLR822029 | artisanal lactic starter (Gruyere de Comte)                    | 1973 | France      |
| CIRM-BIA1046 | CIRM1046   | 1.88980   | 39.0 | 1      | Complete Genome | NZ_LLR822030 | yoghurt                                                        | 1971 | Japan       |
| CIRM-BIA1047 | CIRM1047   | 1.81490   | 39.0 | 1      | Complete Genome | NZ_LLR822031 | lactic starter (for yoghurt making)                            | 1978 | France      |
| CIRM-BIA1048 | CIRM1048   | 1.86536   | 39.0 | 1      | Complete Genome | NZ_LLR822033 | lactic starter (for yoghurt making)                            | 1978 | Bulgaria    |
| CIRM-BIA1049 | CIRM1049   | 1.86535   | 39.0 | 1      | Complete Genome | NZ_LLR822034 | lactic starter                                                 | 1978 | France      |
| CIRM-BIA1050 | CIRM1050   | 1.84723   | 39.0 | 1      | Complete Genome | NZ_LLR822032 | yoghurt (ewe milk)                                             | 1973 | Greece      |
| CIRM-BIA1051 | CIRM1051   | 1.85757   | 39.1 | 1      | Complete Genome | NZ_LLR822035 | yoghurt (Tarag)                                                | 1974 | Mongolia    |
| CIRM-BIA1055 | CIRM1055   | 1.83916   | 39.1 | 1      | Complete Genome | NZ_LLR822036 | yoghurt                                                        | 1990 | France      |
| CIRM-BIA1116 | CIRM1116   | 1.80437   | 39.1 | 1      | Complete Genome | NZ_LLR822039 | yoghurt                                                        | 1963 | France      |
| CIRM-BIA1121 | CIRM1121   | 1.78180   | 39.2 | 2      | Complete Genome | NZ_LLR822037 | lactic starter (for yoghurt making)                            | 1978 | France      |
| Plasmid      |            | 3530 bp   | 32.3 |        |                 |              |                                                                |      |             |
| CIRM-BIA1122 | CIRM1122   | 1.80842   | 39.0 | 1      | Complete Genome | NZ_LLR822041 | lactic starter                                                 | 1979 | France      |
| CIRM-BIA1125 | CIRM1125   | 1.76728   | 39.2 | 1      | Complete Genome | NZ_LLR822040 | yoghurt                                                        | 1987 | Greece      |
| CIRM-BIA1358 | CIRM1358   | 1.80090   | 39.1 | 1      | Complete Genome | NZ_LLR822042 | artisanal lactic starter (Gruyere de Comte)                    | 1974 | France      |
| CIRM-BIA16   | CIRM16     | 1.80404   | 39.0 | 1      | Complete Genome | NZ_LLR822006 | lactic starter (for yoghurt making)                            | 1954 | France      |
| CIRM-BIA18   | CIRM18     | 1.86007   | 39.1 | 1      | Complete Genome | NZ_LLR822008 | artisanal lactic starter (Gruyere de Comte)                    | 1964 | France      |
| CIRM-BIA19   | CIRM19     | 1.82804   | 39.0 | 1      | Complete Genome | NZ_LLR822009 | artisanal lactic starter (Gruyere de Comte)                    | 1963 | France      |
| CIRM-BIA2101 | CIRM2101   | 1.78894   | 39.1 | 1      | Complete Genome | NZ_LLR822011 | commercial lactic starter                                      | 1975 | Germany     |
| CIRM-BIA23   | CIRM23     | 1.79608   | 39.0 | 1      | Complete Genome | NZ_LLR822011 | yoghurt                                                        | 1955 | France      |
| CIRM-BIA29   | CIRM29     | 1.80465   | 39.0 | 1      | Complete Genome | NZ_LLR822010 | yoghurt                                                        | 1960 | Netherlands |
| CIRM-BIA30   | CIRM30     | 1.80141   | 39.1 | 1      | Complete Genome | NZ_LLR822012 | artisanal lactic starter (Gruyere de Comte)                    | 1963 | France      |
| CIRM-BIA32   | CIRM32     | 1.86007   | 39.1 | 1      | Complete Genome | NZ_LLR822013 | artisanal lactic starter (Emmental)                            | 1964 | France      |
| CIRM-BIA336  | CIRM336    | 1.87117   | 39.1 | 2      | Complete Genome | NZ_LLR822017 | milk after contact with traditional sicilian wooden vat (Tina) | 2007 | Italy       |
| Plasmid      |            | 3823 bp   | 33.4 |        |                 |              |                                                                |      |             |
| CIRM-BIA368  | CIRM368    | 2.02646   | 38.8 | 3      | Complete Genome | NZ_LLR822023 | milk after contact with traditional sicilian wooden vat (Tina) | 2007 | Italy       |
| Plasmid 1    |            | 4451 bp   | 39.4 |        |                 |              |                                                                |      |             |
| Plasmid 2    |            | 2162 bp   | 36.8 |        |                 |              |                                                                |      |             |
| CIRM-BIA36   | CIRM36     | 1.78366   | 39.1 | 1      | Complete Genome | NZ_LLR822014 | yoghurt                                                        | 1971 | France      |
| CIRM-BIA65   | CIRM65     | 1.78829   | 39.1 | 2      | Complete Genome | NZ_LLR822015 | lactic starter (for yoghurt making)                            | 1971 | France      |
| Plasmid      |            | 3345 bp   | 35.5 |        |                 |              |                                                                |      |             |
| CIRM-BIA67   | CIRM67     | 1.77325   | 39.1 | 2      | Complete Genome | NZ_LLR824002 | lactic starter (for yoghurt making)                            | 1971 | France      |
| Plasmid      |            | 3345 bp   | 35.5 |        |                 |              |                                                                |      |             |
| CIRM-BIA772  | CIRM772    | 1.77249   | 39.2 | 1      | Complete Genome | NZ_LLR822019 | fermented milk                                                 | 1963 | France      |
| CIRM-BIA956  | CIRM956    | 1.99901   | 38.7 | 3      | Complete Genome | NZ_LLR822020 | cow raw milk                                                   | 2009 | Italy       |
| Plasmid 1    |            | 4403 bp   | 39.4 |        |                 |              |                                                                |      |             |
| Plasmid 2    |            | 2162 bp   | 36.8 |        |                 |              |                                                                |      |             |
| CIRM-BIA961  | CIRM961    | 2.01958   | 38.9 | 1      | Complete Genome | NZ_LLR822025 | cow raw milk                                                   | 2009 | Italy       |
| CIRM-BIA967  | CIRM967    | 2.01753   | 38.9 | 1      | Complete Genome | NZ_LLR822026 | cow raw milk                                                   | 2009 | Italy       |
| CIRM-BIA998  | CIRM998    | 1.97776   | 38.9 | 2      | Complete Genome | NZ_LLR822027 | cow raw milk                                                   | 2009 | Italy       |
| Plasmid      |            | 4395 bp   | 39.3 |        |                 |              |                                                                |      |             |

Table S2: *Streptococcus thermophilus* genomes sequenced from the CIRM-BIA collection (see Sample Availability chapter).

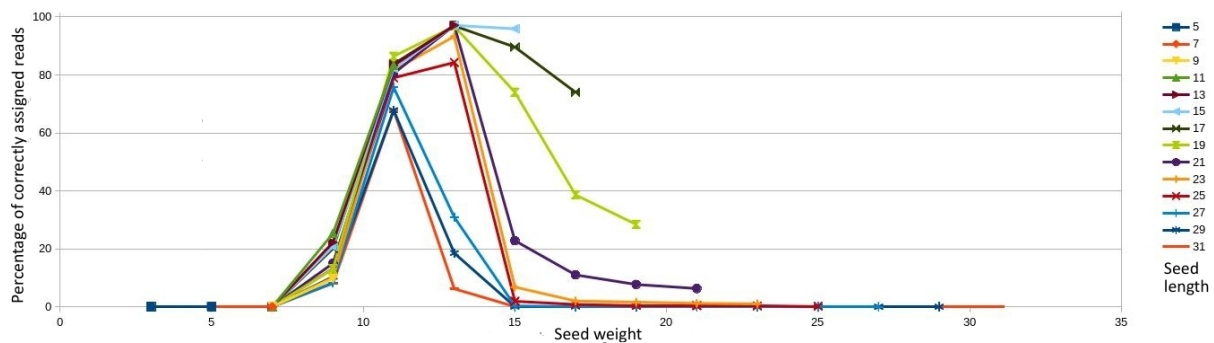

Figure S1: Identification results of 4000 reads of *S. thermophilus* JIM8232 strain using different seed length and seed weight. The seed patterns were calculated using the iedera software (33, 34).

Table S3: Composition of the 180 strains identification experiments.

| Strains proximity | Close                                      |                                                                  | Moderately close                             |                                                                   | Distant                                    |                                                                    |
|-------------------|--------------------------------------------|------------------------------------------------------------------|----------------------------------------------|-------------------------------------------------------------------|--------------------------------------------|--------------------------------------------------------------------|
|                   | 4                                          | 6                                                                | 4                                            | 6                                                                 | 4                                          | 6                                                                  |
| Experiment 1      | CIRM65<br>CIRM23<br>CIRM1049<br>CIRM1048   | CIRM65<br>CIRM36<br>CIRM23<br>CIRM67<br>CIRM32<br>CIRM18         | JIM 8232<br>CIRM1358<br>CIRM1047<br>CIRM1051 | CIRM2101<br>CIRM1047<br>CIRM65<br>CIRM1049<br>CIRM772<br>CIRM1035 | CIRM1047<br>CIRM368<br>CIRM336<br>CIRM956  | CIRM1121<br>CIRM1055<br>CIRM1047<br>CIRM1116<br>CIRM772<br>CIRM336 |
| Experiment 2      | CIRM67<br>CIRM36<br>CIRM29<br>CIRM1122     | CIRM18<br>CIRM32<br>CIRM23<br>CIRM67<br>CIRM2101<br>CIRM65       | CIRM1050<br>CIRM65<br>CIRM1035<br>CIRM1116   | CIRM32<br>CIRM1055<br>CIRM67<br>CIRM1125<br>CIRM1048<br>CIRM30    | CIRM1050<br>CIRM2101<br>CIRM30<br>CIRM1051 | CIRM30<br>CIRM961<br>JIM 8232<br>CIRM368<br>CIRM1125<br>CIRM772    |
| Experiment 3      | CIRM1048<br>CIRM1049<br>CIRM1122<br>CIRM29 | CIRM1116<br>CIRM1122<br>CIRM961<br>CIRM967<br>CIRM67<br>CIRM2101 | CIRM30<br>CIRM1055<br>CIRM1051<br>CIRM67     | CIRM19<br>CIRM2101<br>CIRM1050<br>CIRM772<br>CIRM1116<br>CIRM23   | CIRM1125<br>CIRM1121<br>CIRM772<br>CIRM18  | CIRM1050<br>CIRM1055<br>CIRM772<br>CIRM32<br>CIRM1121<br>CIRM1116  |
| Experiment 4      | CIRM2101<br>CIRM36<br>CIRM967<br>CIRM961   | CIRM1116<br>CIRM29<br>CIRM65<br>CIRM2101<br>CIRM23<br>CIRM67     | CIRM1055<br>CIRM36<br>CIRM1046<br>JIM 8232   | CIRM30<br>CIRM32<br>CIRM1358<br>CIRM65<br>CIRM1116<br>CIRM2101    | CIRM1125<br>CIRM998<br>CIRM30<br>CIRM961   | CIRM1121<br>CIRM19<br>CIRM1046<br>CIRM961<br>CIRM1050<br>CIRM29    |
| Experiment 5      | CIRM1116<br>CIRM29<br>CIRM961<br>CIRM967   | CIRM36<br>CIRM2101<br>CIRM67<br>CIRM65<br>CIRM961<br>CIRM967     | CIRM18<br>CIRM36<br>CIRM772<br>CIRM32        | CIRM368<br>CIRM961<br>CIRM967<br>CIRM336<br>CIRM998<br>CIRM956    | CIRM1046<br>CIRM961<br>JIM 8232<br>CIRM18  | CIRM336<br>CIRM1049<br>JIM 8232<br>CIRM32<br>CIRM772<br>CIRM998    |

| Distribution | Reads number |      |       |                          |      |       |
|--------------|--------------|------|-------|--------------------------|------|-------|
|              | Uniform      |      |       | Dominant and subdominant |      |       |
| 4 strains    | 1000         | 4000 | 16000 | 1000                     | 4000 | 16000 |
| 1            | 250          | 1000 | 4000  | 500                      | 2000 | 8000  |
| 2            | 250          | 1000 | 4000  | 250                      | 1000 | 4000  |
| 3            | 250          | 1000 | 4000  | 125                      | 500  | 2000  |
| 4            | 250          | 1000 | 4000  | 125                      | 500  | 2000  |
| 6 strains    | 1000         | 4000 | 16000 | 1000                     | 4000 | 16000 |
| 1            | 167          | 667  | 2667  | 500                      | 2000 | 8000  |
| 2            | 167          | 667  | 2667  | 250                      | 1000 | 4000  |
| 3            | 167          | 667  | 2667  | 125                      | 500  | 2000  |
| 4            | 167          | 667  | 2667  | 62                       | 250  | 1000  |
| 5            | 166          | 666  | 2666  | 32                       | 125  | 500   |
| 6            | 166          | 666  | 2666  | 31                       | 125  | 500   |

Table S4: **Hamming distance between *S. thermophilus* strains** for strain proximity experiments (identification of strains more or less close)

| Distance x 10 <sup>4</sup> | close    | medium   | distant  |
|----------------------------|----------|----------|----------|
| Average                    | 7.16     | 7.72     | 11.94    |
| Mean std                   | 5.21     | 2.23     | 3.81     |
| Average Min/Max            | 0.0/11.6 | 2.7/10.3 | 6.4/16.4 |

Table S5: **Clusters of sibling strains.** Cluster numbers also appear in the heatmap (Figure S2)

| Cluster id | Strains                                                           |
|------------|-------------------------------------------------------------------|
| 1          | 05-34 ; ASCC_1275 ; DGCC_7710 ; KLDS_SM ; MN-BM-A02 ; ND07 ; C106 |
| 2          | CIRM1048 ; CIRM1049                                               |
| 3          | CIRM1051 ; MN-BM-A01 ; MN-ZLW-002                                 |
| 4          | CIRM1055 ; APC151 ; KLDS3.1012 ; KU30 ; ND03                      |
| 5          | CIRM1116 ; CIRM1122 ; CIRM16 ; CIRM29 ; CNRZ1066 ; CS8 ; EPS ; S9 |
| 6          | CIRM18 ; CIRM32                                                   |
| 7          | CIRM2101 ; CIRM23 ; CIRM36 ; CIRM65 ; CIRM67 ; LMG_18311          |
| 8          | CIRM961 ; CIRM967                                                 |
| 9          | IDCC2201 ; BIO1488                                                |
| 10         | LMD-9 ; LMG_S-29186 ; SMQ-301                                     |
| 11         | ATCC_19258 ; NCTC12958                                            |
| 12         | MTCC_5460 ; MTCC_5461                                             |

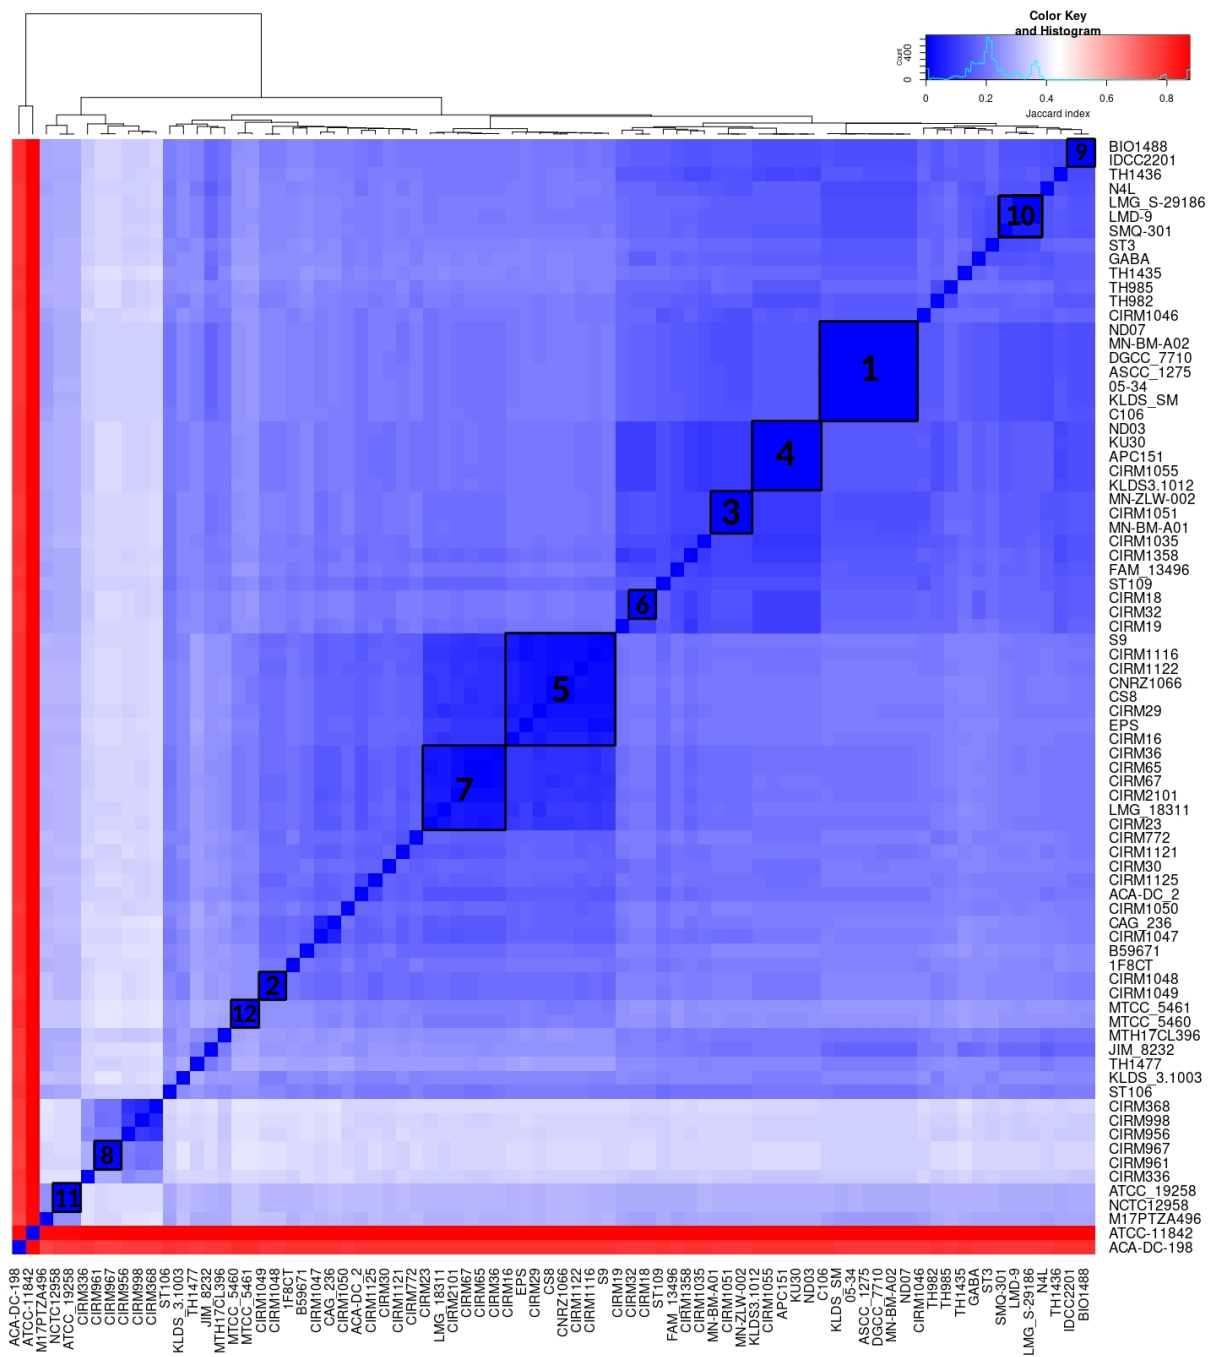

Figure S2: Heatmap of the Jaccard distance for 77 *S.thermophilus* strains + *S. macedonicus* ACA-DC 198 + *L. delbrueckii* subsp. *bulgaricus* ATCC 11842. The clusters of Table S5 are represented by black squares numbered from 1 to 12

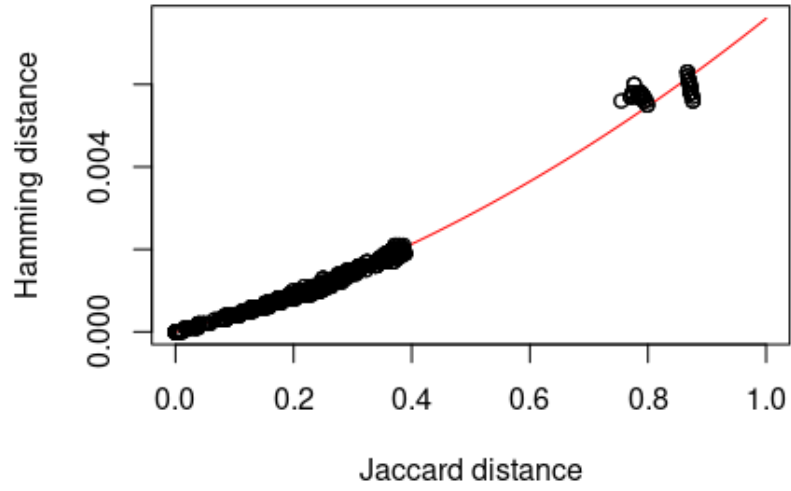

Figure S3: Correlation between Jaccard and Hamming distances with quadratic regression curve.



Table S6: Precision of the *Streptococcus thermophilus* strains identification using ORI with and without clustering of sibling strains for all the experiments. The clusters are the same as in Table S5. The percentage represents the number of times the strain was correctly identified divided by the number of times it was identified. This corresponds to the precision:  $TP/(TP+FP)$  with TP = true positives and FP = false positives.

| Cluster id | Strain   | Precision without merge (%) | Precision with merge (%) |
|------------|----------|-----------------------------|--------------------------|
| 2          | CIRM1048 | 54.5                        | 100.0                    |
|            | CIRM1049 | 81.2                        |                          |
| 3          | CIRM1051 | 100.0                       | 100.0                    |
| 4          | CIRM1055 | 100.0                       | 100.0                    |
| 5          | CIRM29   | 100.0                       | 91.8                     |
|            | CIRM1116 | 100.0                       |                          |
|            | CIRM1122 | 100.0                       |                          |
| 6          | CIRM18   | 33.3                        | 100.0                    |
|            | CIRM32   | 80.6                        |                          |
| 7          | CIRM67   | 50.0                        | 100.0                    |
|            | CIRM36   | 60.0                        |                          |
|            | CIRM65   | 77.3                        |                          |
|            | CIRM2101 | 100.0                       |                          |
|            | CIRM23   | 100.0                       |                          |
| 8          | CIRM967  | 100.0                       | 100.0                    |
|            | CIRM961  | 100.0                       |                          |
| No cluster | CIRM1125 | 62.5                        | 76.0                     |
|            | CIRM19   | 83.3                        | 100.0                    |
|            | CIRM368  | 89.5                        | 94.4                     |
|            | CIRM1050 | 100.0                       | 100.0                    |
|            | CIRM30   | 100.0                       | 100.0                    |
|            | CIRM1046 | 100.0                       | 100.0                    |
|            | JIM_8232 | 100.0                       | 100.0                    |
|            | CIRM998  | 100.0                       | 100.0                    |
|            | CIRM772  | 100.0                       | 100.0                    |
|            | CIRM1121 | 100.0                       | 100.0                    |
|            | CIRM1035 | 100.0                       | 100.0                    |
|            | CIRM336  | 100.0                       | 100.0                    |
|            | CIRM1047 | 100.0                       | 100.0                    |
|            | CIRM1358 | 100.0                       | 100.0                    |
|            | CIRM956  | 100.0                       | 100.0                    |

Table S7: Precision of the *Streptococcus thermophilus* subdominant strains identification using ORI without clustering of sibling strains for experiments with dominant and subdominant strains. The clusters are the same as in Table S5. The percentage represents the number of times the strain was correctly identified divided by the number of times it was identified. This corresponds to the precision: TP/(TP+FP) with TP = true positives and FP = false positives. Unpredicted means that the strain is not identified in any experiment.

| Precision without merge (%) |          |             |             |             |
|-----------------------------|----------|-------------|-------------|-------------|
| Cluster id                  | Strain   | 1000 reads  | 4000 reads  | 16000 reads |
| 2                           | CIRM1048 | 0.0         | 0.0         | 0.0         |
|                             | CIRM1049 | 50.0        | 100.0       | 33.33       |
| 3                           | CIRM1051 | 100.0       | 100.0       | 100.0       |
| 4                           | CIRM1055 | Unpredicted | Unpredicted | Unpredicted |
| 5                           | CIRM1116 | 0.0         | 0.0         | 0.0         |
|                             | CIRM1122 | Unpredicted | 66.67       | 66.67       |
|                             | CIRM29   | 50.0        | 50.0        | 33.33       |
| 6                           | CIRM18   | 0.0         | 50.0        | 0.0         |
|                             | CIRM32   | 33.33       | 0.0         | 42.86       |
| 7                           | CIRM2101 | 0.0         | 0.0         | 0.0         |
|                             | CIRM23   | Unpredicted | 0.0         | 33.33       |
|                             | CIRM65   | 0.0         | 14.29       | 0.0         |
|                             | CIRM67   | 50.0        | Unpredicted | Unpredicted |
| 8                           | CIRM961  | 40.0        | 50.0        | 55.56       |
|                             | CIRM967  | 75.0        | 100.0       | 100.0       |
| No cluster                  | CIRM1125 | 0.0         | 0.0         | 0.0         |
|                             | CIRM1121 | 0.0         | 0.0         | 0.0         |
|                             | CIRM1050 | 0.0         | 0.0         | 20.0        |
|                             | CIRM30   | 0.0         | 25.0        | 25.0        |
|                             | CIRM1047 | 0.0         | 25.0        | 25.0        |
|                             | CIRM998  | 0.0         | 50.0        | 66.67       |
|                             | CIRM956  | Unpredicted | Unpredicted | 100.0       |
|                             | CIRM1035 | Unpredicted | 100.0       | 100.0       |
|                             | CIRM368  | 25.0        | 33.33       | 33.33       |
|                             | JIM_8232 | 40.0        | 40.0        | 40.0        |
|                             | CIRM1046 | 50.0        | 33.33       | 33.33       |
|                             | CIRM336  | 66.67       | 66.67       | 75.0        |
| CIRM772                     | 100.0    | 50.0        | 75.0        |             |

Table S8: *S. thermophilus* strains identification by ORI, with and without merge index, in a balanced mixture of 4 or 6 strains more or less genetically close, by using 1000, 4000 or 16000 Nanopore sequencing reads. Best results are in bold. Values of Hamming distance (zero = perfect identification); MCC: Matthews Correlation Coefficient (1 = perfect correlation); ratio: number of strains identified / number of strains present; std: standard deviation.

(a) Heterogeneity results (variable number of strains mixed):

| Method            |           | ORI      |             | ORI_merge   |             |
|-------------------|-----------|----------|-------------|-------------|-------------|
| Number of strains |           | 4        | 6           | 4           | 6           |
| Distance          | median    | <b>0</b> | <b>0</b>    | <b>0</b>    | <b>0</b>    |
|                   | mean      | 0.73     | 0.31        | <b>0.53</b> | <b>0.29</b> |
|                   | std       | 2.64     | <b>1.13</b> | <b>1.78</b> | 1.19        |
|                   | [min,max] | [0,15]   | [0,7]       | [0,7]       | [0,7]       |
| MCC               | mean      | 0.70     | 0.65        | <b>0.94</b> | <b>0.96</b> |
|                   | std       | 0.18     | 0.15        | <b>0.10</b> | <b>0.08</b> |
| Ambiguity         | mean      | 0.65     | 0.56        | <b>0.93</b> | <b>0.96</b> |
|                   | std       | 0.25     | 0.21        | <b>0.19</b> | <b>0.15</b> |

(b) Data quantity (different number of .fastq reads):

| Method          |           | ORI         |          |             | ORI_merge   |             |             |
|-----------------|-----------|-------------|----------|-------------|-------------|-------------|-------------|
| Number of reads |           | 1000        | 4000     | 16000       | 1000        | 4000        | 16000       |
| Distance        | median    | <b>0</b>    | <b>0</b> | <b>0</b>    | <b>0</b>    | <b>0</b>    | <b>0</b>    |
|                 | mean      | 0.17        | 0.80     | <b>0.60</b> | <b>0</b>    | <b>0.43</b> | 0.80        |
|                 | std       | 0.73        | 2.93     | <b>1.80</b> | <b>0</b>    | <b>1.43</b> | 2.14        |
|                 | [min,max] | [0,4]       | [0,15]   | [0,7]       | [0,0]       | [0,7]       | [0,7]       |
| MCC             | mean      | 0.55        | 0.64     | 0.78        | <b>0.86</b> | <b>0.93</b> | <b>0.98</b> |
|                 | std       | 0.20        | 0.18     | 0.14        | <b>0.14</b> | <b>0.12</b> | <b>0.05</b> |
| Ambiguity       | mean      | 0.44        | 0.64     | 0.80        | <b>0.77</b> | <b>0.92</b> | <b>1.05</b> |
|                 | std       | <b>0.17</b> | 0.20     | 0.20        | 0.21        | <b>0.12</b> | <b>0.13</b> |

(c) Resolution power (proximity between strains within the mixture):

| Method    |           | ORI      |          |             | ORI_merge   |             |             |
|-----------|-----------|----------|----------|-------------|-------------|-------------|-------------|
| Proximity |           | distant  | medium   | close       | distant     | medium      | close       |
| Distance  | median    | <b>0</b> | <b>0</b> | <b>0</b>    | <b>0</b>    | <b>0</b>    | <b>0</b>    |
|           | mean      | 0.10     | 1.17     | <b>0.30</b> | <b>0</b>    | <b>0.90</b> | 0.33        |
|           | std       | 0.54     | 3.16     | <b>1.27</b> | <b>0</b>    | <b>2.17</b> | 1.35        |
|           | [min,max] | [0,3]    | [0,15]   | [0,7]       | [0,0]       | [0,7]       | [0,7]       |
| MCC       | mean      | 0.75     | 0.61     | 0.6         | <b>0.93</b> | <b>0.87</b> | <b>0.97</b> |
|           | std       | 0.17     | 0.24     | 0.14        | <b>0.09</b> | <b>0.15</b> | <b>0.09</b> |
| Ambiguity | mean      | 0.73     | 0.68     | 0.47        | <b>0.89</b> | <b>0.85</b> | <b>1</b>    |
|           | std       | 0.20     | 0.23     | 0.19        | <b>0.15</b> | <b>0.22</b> | <b>0.18</b> |

Table S9: **Subdominant *S. thermophilus* strains identification by ORI, without/with merge in a mixture of 4 or 6 strains, by using 1000, 4000 or 16000 Nanopore sequencing reads.** Best results are in bold. Values of Hamming distance: in all experiments, minimum value is 0 (perfect identification); MCC: Matthews Correlation Coefficient (1 = perfect correlation); Ambiguity ratio: number of strains identified / number of strains present; std: standard deviation.

| Number of strains |        | 4 (ORI/ORI merge) |                   |                   | 6 (ORI/ORI merge) |                   |                   |
|-------------------|--------|-------------------|-------------------|-------------------|-------------------|-------------------|-------------------|
| Number of reads   |        | 1000              | 4000              | 16000             | 1000              | 4000              | 16000             |
| Distance          | median | <b>0/0</b>        | <b>0/0</b>        | <b>0/0</b>        | 3/0               | <b>0/0</b>        | <b>0/0</b>        |
|                   | mean   | 19.8/19.8         | 9.9/ <b>0</b>     | <b>0/0</b>        | 30.3/ <b>15.4</b> | 26.7/ <b>0</b>    | <b>0/0</b>        |
|                   | std    | 24.2/24.2         | 19.8/ <b>0</b>    | <b>0/0</b>        | 35.9/ <b>29.4</b> | 36.3/ <b>0</b>    | <b>0/0</b>        |
|                   | max    | 49/49             | 49/ <b>0</b>      | <b>0/0</b>        | 74.2/74.2         | 74.2/ <b>0</b>    | <b>0/0</b>        |
| MCC               | mean   | 0.28/ <b>0.38</b> | 0.42/ <b>0.78</b> | 0.57/ <b>0.9</b>  | 0.22/ <b>0.38</b> | 0.34/ <b>0.65</b> | 0.63/ <b>0.8</b>  |
|                   | std    | 0.35/ <b>0.32</b> | 0.35/ <b>0.2</b>  | 0.34/ <b>0.21</b> | <b>0.28</b> /0.34 | 0.28/ <b>0.17</b> | 0.16/ <b>0.14</b> |
| Ambiguity         | mean   | 0.4/0.4           | 0.5/ <b>0.8</b>   | 0.7/1             | 0.2/ <b>0.33</b>  | 0.2/ <b>0.47</b>  | 0.53/ <b>0.67</b> |
|                   | std    | 0.37/0.37         | 0.32/ <b>0.24</b> | 0.24/ <b>0</b>    | <b>0.16</b> /0.21 | <b>0.16</b> /0.27 | <b>0.16</b> /0.21 |

$$J(G1, G2) = \frac{|G1 \cup G2| - |G1 \cap G2|}{|G1 \cup G2|} \quad (1)$$

$$H(G1, G2) = \frac{\text{Number of positions where filters are different}}{\text{Total number of positions}} \quad (2)$$

Equation S1: **Jaccard (1) and Hamming (2) distance equations.** The Jaccard distance is calculated between the qgrams of two genomes (G1 & G2) and the Hamming distance is calculated between two Bloom filters containing these qgrams.

$$MCC = \frac{TP \times TN - FP \times FN}{\sqrt{(TP + FP) \times (TP + FN) \times (TN + FP) \times (TN + FN)}}$$

Equation S2: **Matthews correlation coefficient equation.** TP = number of true positives, FP = number of false positives, TN = number of true negatives and FN = number of false negatives.

**Text S1: *S. thermophilus* strains cannot be differentiated using 16S-23S markers or MLST**

The proximity between genomes makes the taxonomic attribution of bacterial strains difficult, and these noisy long reads make it even more challenging. Indeed, the comparison of their 16S-23S genomic regions showed a maximum of 11 mutations of discrepancies over a length of about 1420 bases (e.g. strains ST106 vs CIRM-BIA967) and no difference in many. The identification of strains of *S. thermophilus* is thus a difficult problem. Indeed, since these strains have very close core genomes, they cannot be differentiated using MLST either (40).

**Text S2: Theoretical point of view of the strain identification part**

Find a subset of strains that best explain the observed reads may be seen as a set cover optimization problem: find a minimal subset of strains allowing to fully explain the reads. It is one of Karp's NP-complete problems and people usually limit themselves to approximated solution through a statistical approach (see e.g. (41)). It is however possible to search for an exact solution of moderate size (say a few dozens of OTU's in the sample) using modern combinatorial solvers.
